# Supplementary material
Source: Springer Nature journal article supplement (https://www.springermedizin.de/resource/supplementary/12981_2009_123_MOESM3_ESM.pdf/9603872)

**A - 612**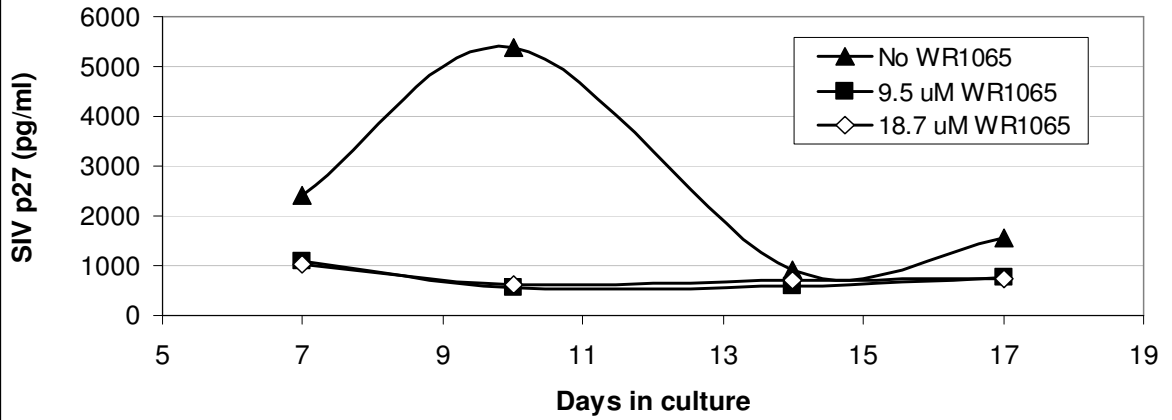**B - 642**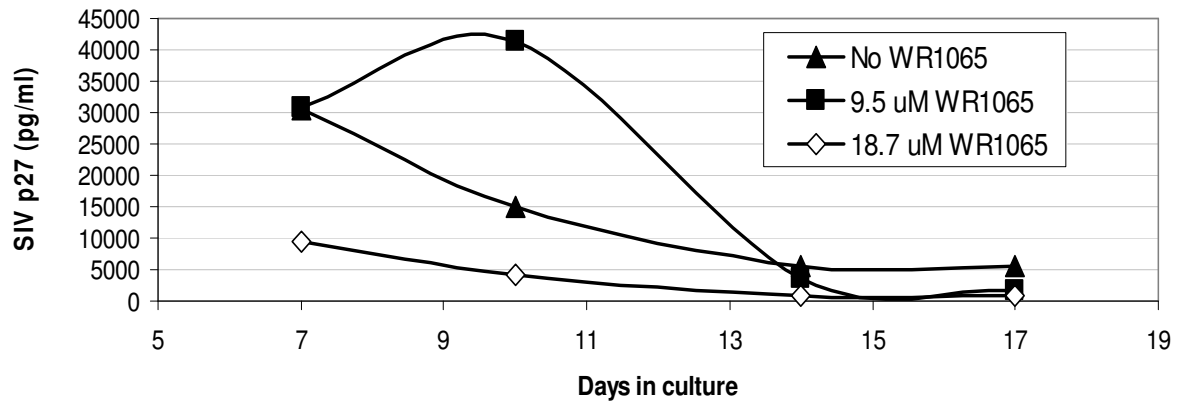**C - 674**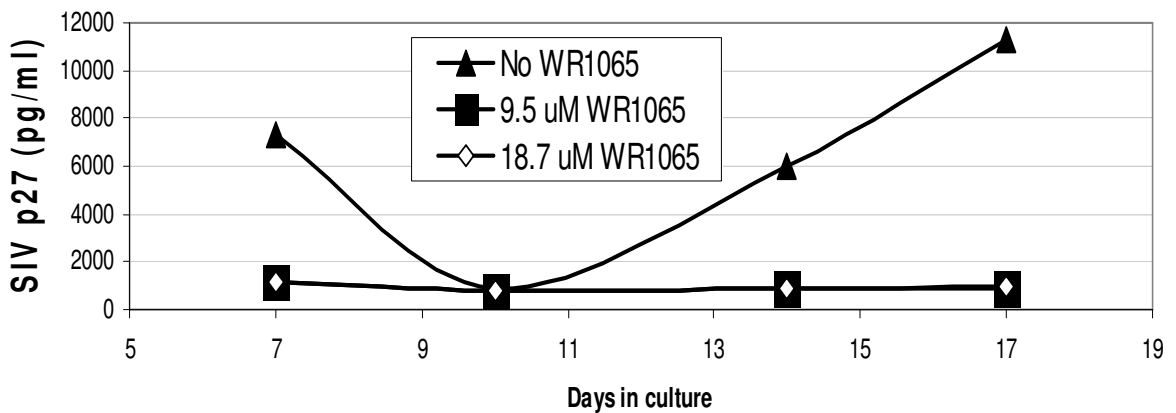

Supplement: MOESM3 [file 9603872]
